# Supplementary material for: Kiwifruit Adaptation to Rising Vapor Pressure Deficit Increases the Risk of Kiwifruit Decline Syndrome Occurrence
Source: MDPI journal article supplement (doi:10.3390/horticulturae8100906), 2022-10-04
Supplement: s1 [file s1]

Archive with 1 entries (1 files):
- horticulturae-1908284-supplementary.pdf
