# Supplementary material for: Kiwifruit Adaptation to Rising Vapor Pressure Deficit Increases the Risk of Kiwifruit Decline Syndrome Occurrence
Source: MDPI journal article supplement (doi:10.3390/horticulturae8100906), 2022-10-04
Supplement: s1 [file s1 › horticulturae-1908284-supplementary.pdf]

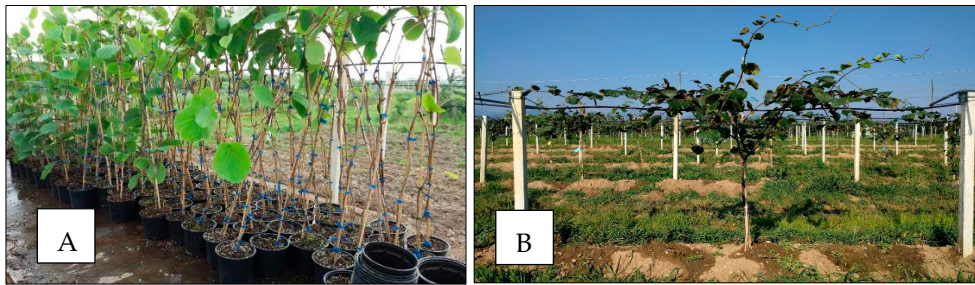

**Figure S1.** Kiwifruit cv Hayward. A. plants used for plantation. B. Plant from the experimental orchard at the second year of growth.

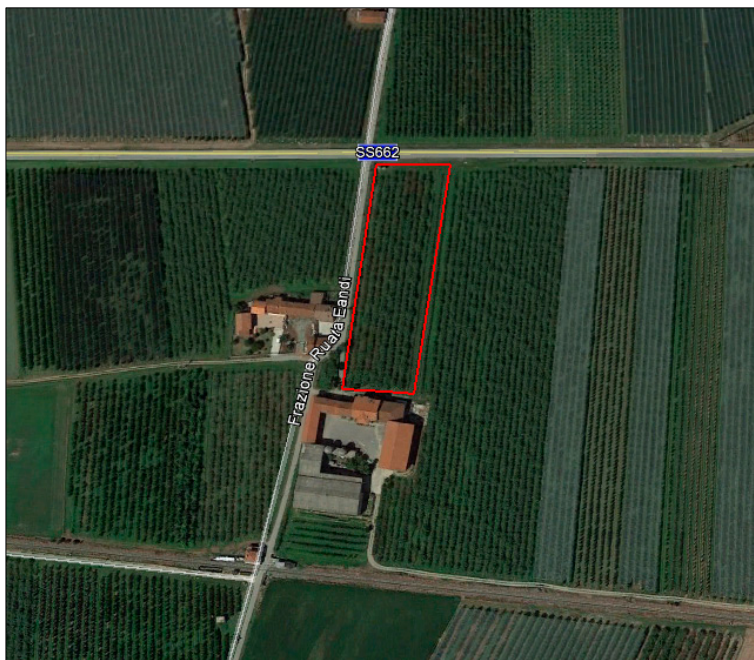

**Figure S2.** Field where the experimental orchard was planted (Saluzzo, CN, 44°38'49.8"N 7°31'52.6"E).

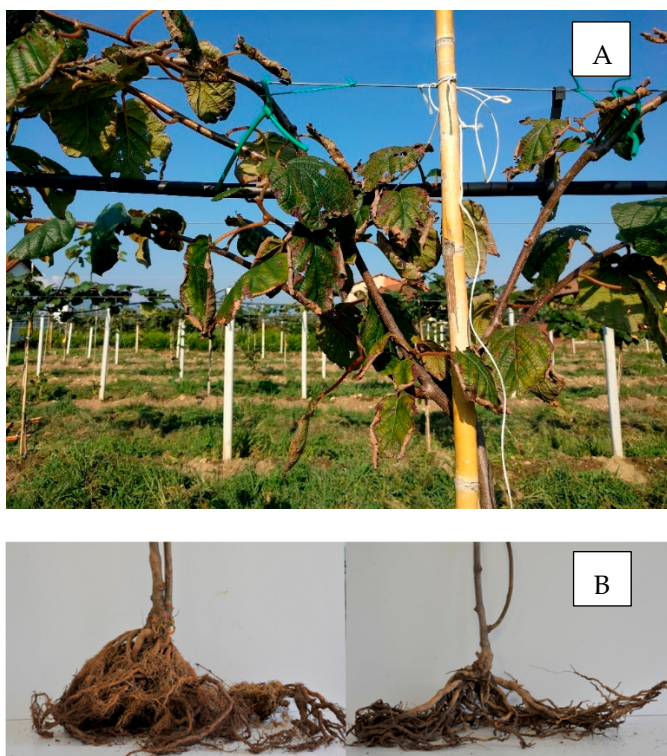

**Figure S3.** KiDS symptoms found in Saluzzo region. A. leaves chlorosis and desiccation, petiole wilt. B. roots from a healthy (left) and from a KiDS affected (right) plant.

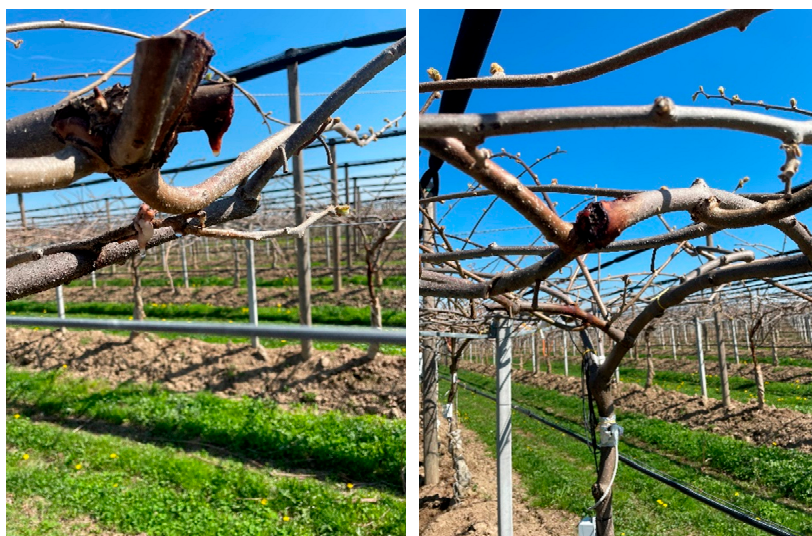

**Figure S4.** Typical early bacterial disease PSA symptoms (canker, cortical necrosis, exudates).

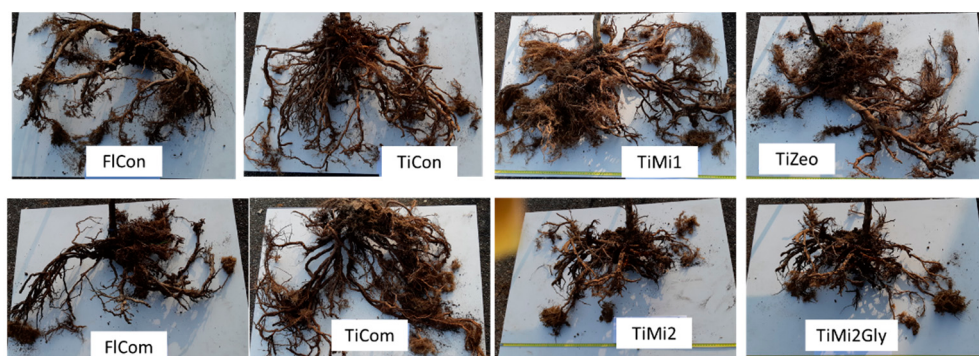

**Figure S5.** Entire root systems of plants explanted at the end of the trial (end of the third year).
